# Supplementary material for: Assembly and maintenance of the flagellum attachment zone filament in Trypanosoma brucei
Source: Oxford University Press journal article supplement (doi:10.1242/jcs.168377), 2015-05-14
Supplement: jcs168377_supp.pdf [file jcs168377_supp.pdf]

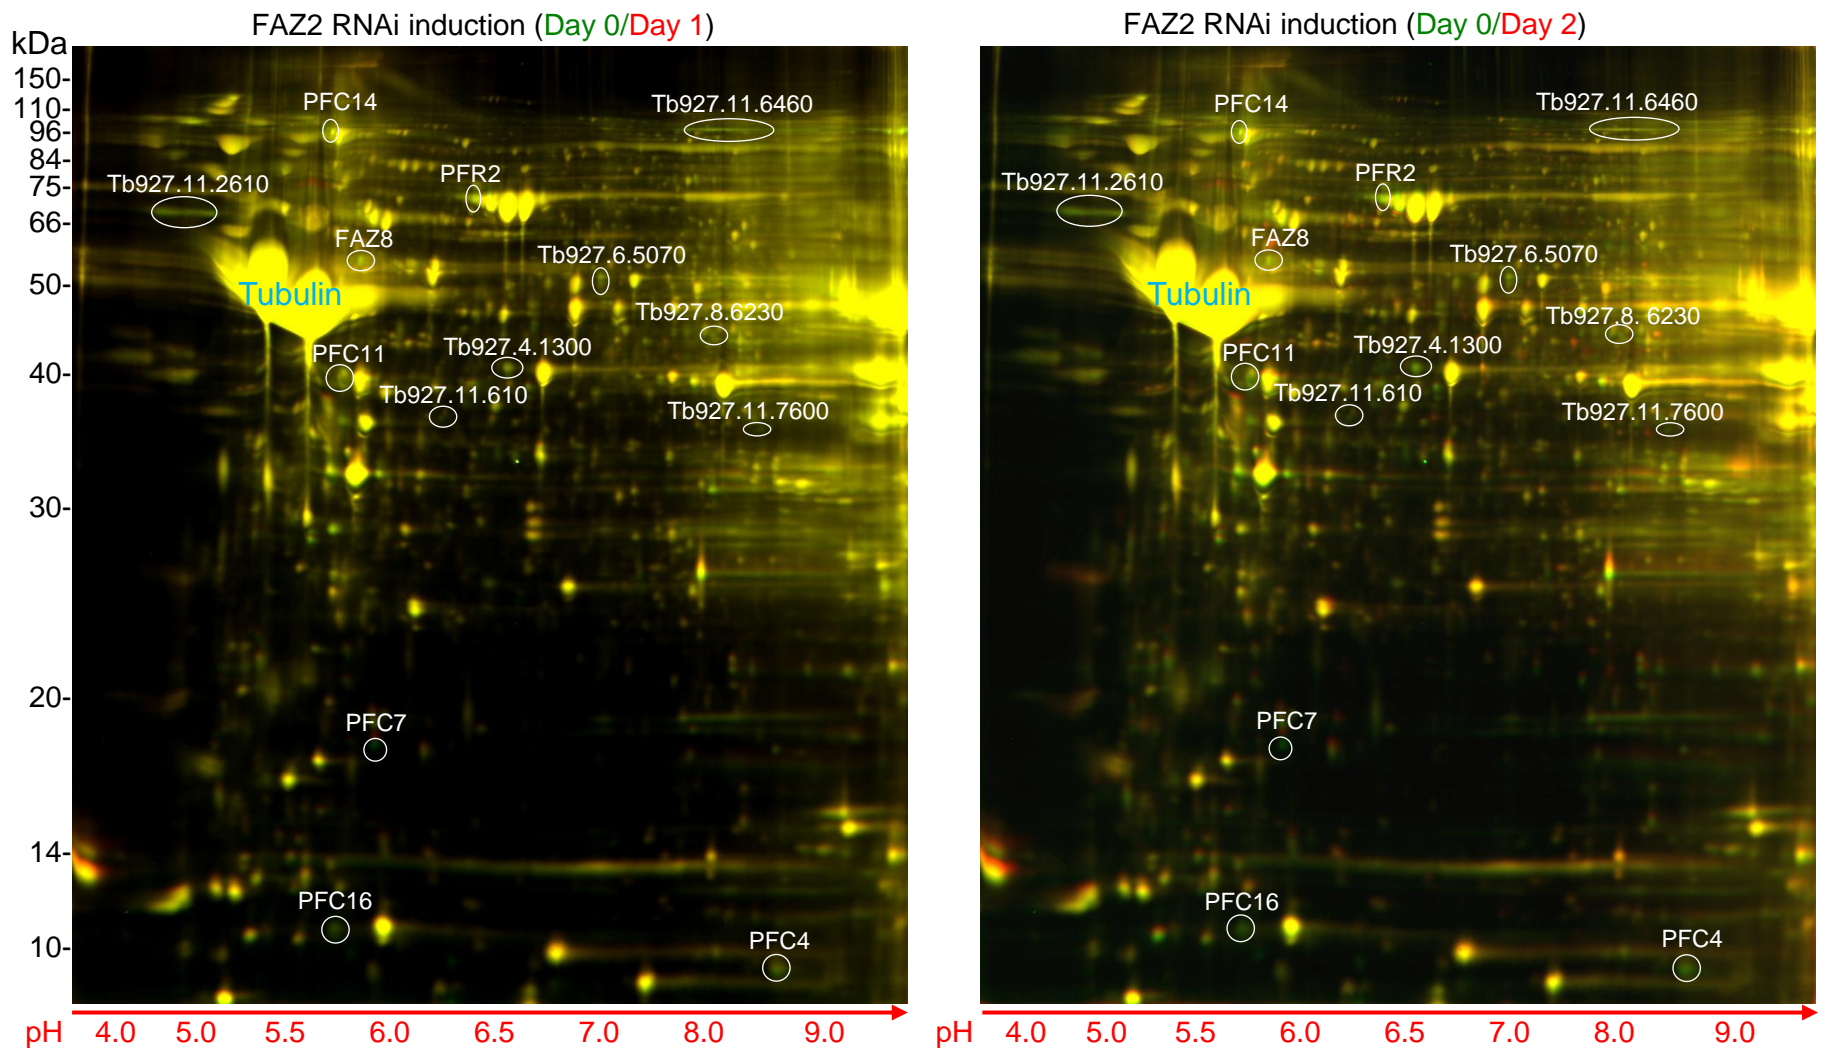

**Figure S1. Two-dimensional DiGE analysis of non-induced and FAZ2 RNAi-induced cells.** Non-induced and FAZ2 RNAi-induced cells (1 and 2 days) were lysed with PEME buffer containing 1% NP-40 to prepare cytoskeletons. Cytoskeletal proteins were further analyzed by 2D-DiGE. A total of 20 protein spots down-regulated from the cytoskeleton after FAZ2 RNAi were selected for mass spectrometry for protein identification. 14 out of the 20 proteins thus identified were previously reported to associate with the flagellum-associated structures. These 14 protein spots were marked in white circles, with the accession numbers or the names of the identified proteins shown above the white circles. The highly abundant tubulin protein was indicated in blue.

# A. Intact cells

# Figure S2

## 1. FAZ filament protein

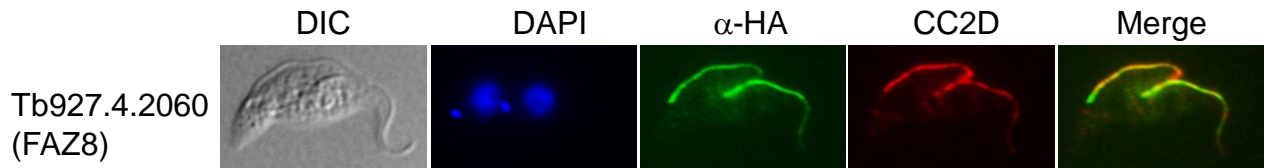

## 2. Flagellum protein

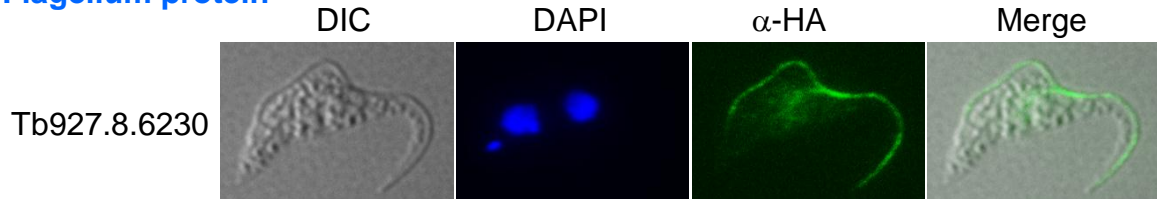

## 3. Flagellum and cytoplasm proteins

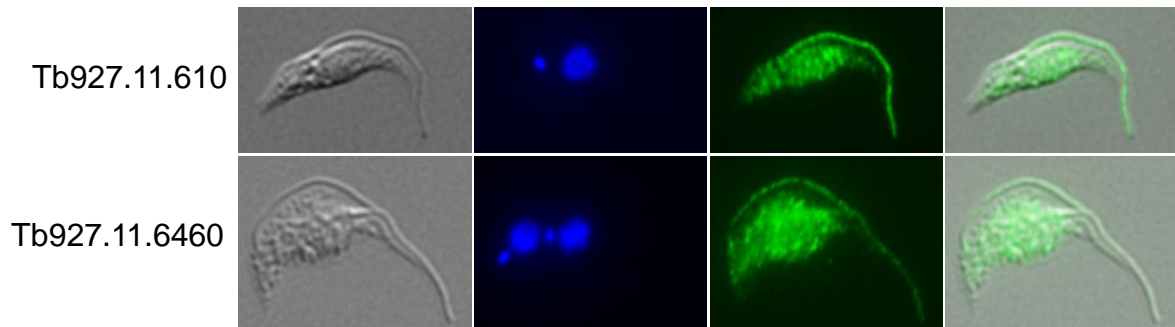

## 4. Flagellum and cytoskeleton protein

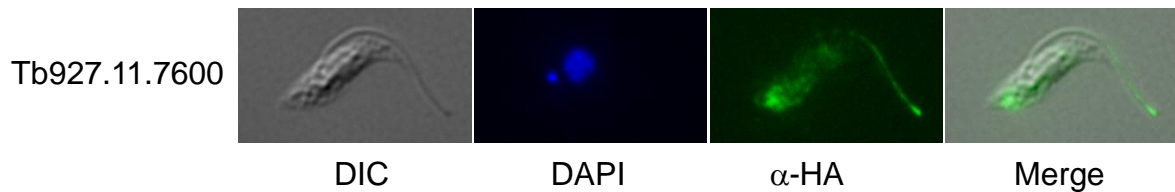

## 5. Cytoskeleton proteins

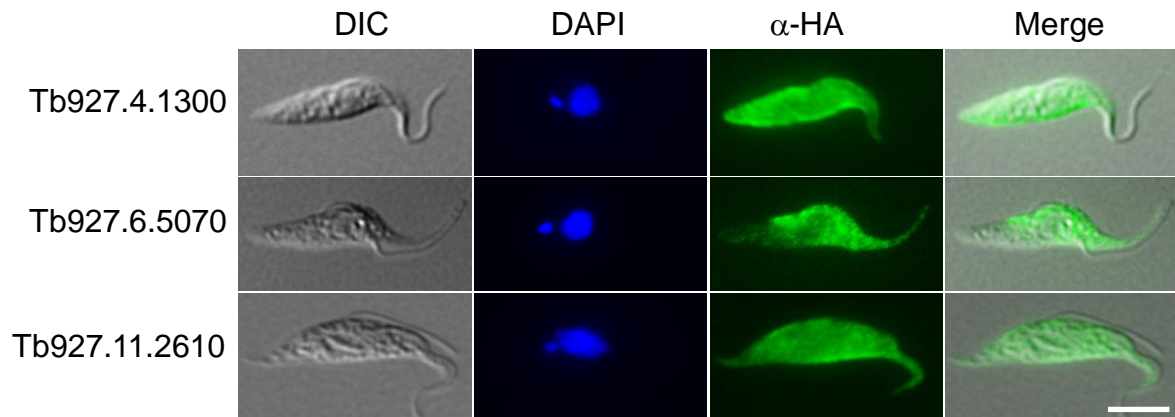

# Figure S2 - continued

## B. Cytoskeleton

### 3. Flagellum and cytoplasm proteins

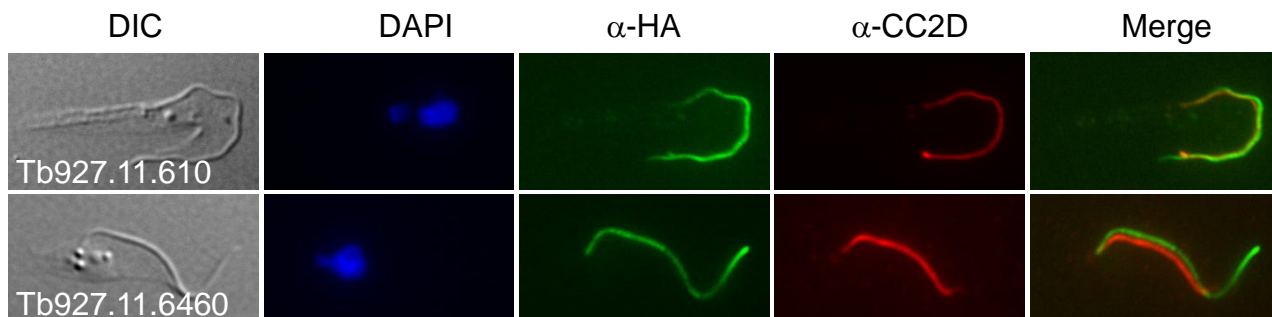

### 4. Flagellum and cytoskeleton protein

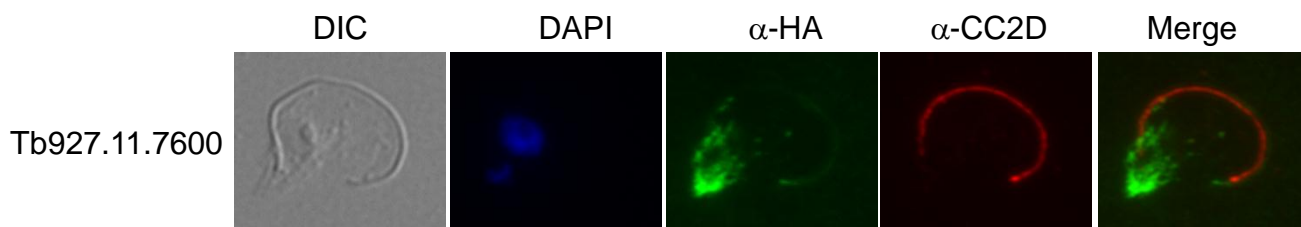

### 5. Cytoskeleton proteins

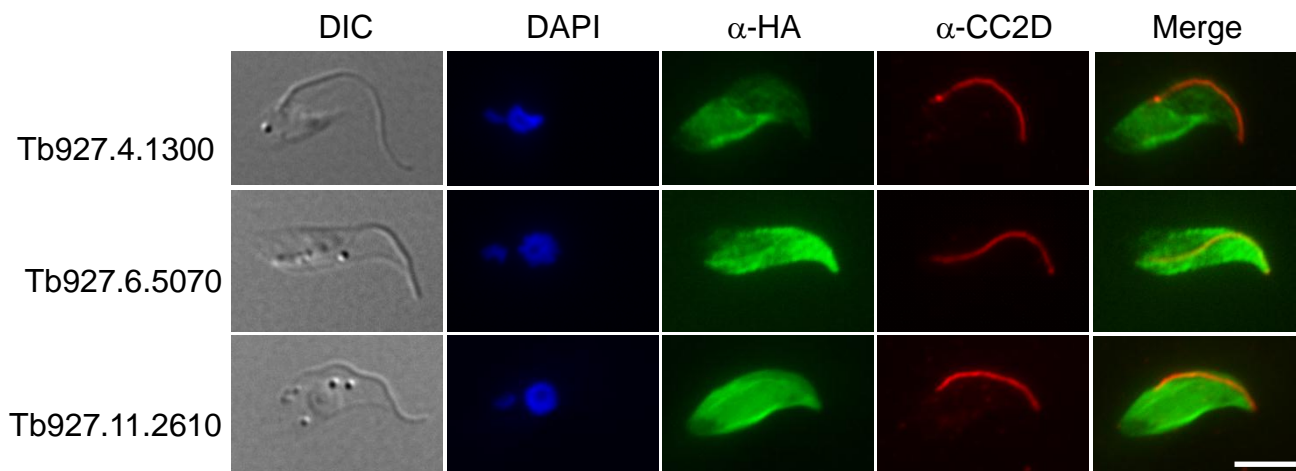

**Figure S2. Subcellular localization of the proteins down-regulated from the cytoskeleton upon FAZ2 RNAi.** Cells expressing endogenously 3HA-tagged proteins were immunostained with anti-HA and counterstained with DAPI. For some proteins, cells were co-immunostained with anti-CC2D to label the FAZ filament. (A). Intact cells were fixed with cold methanol and then immunostained with antibodies. (B). Cytoskeletons were prepared by treating the cells with PEME buffer containing 1% NP40 and then co-immunostained with anti-HA mAb and anti-CC2D pAb. Scale bar: 5  $\mu$ m.

A

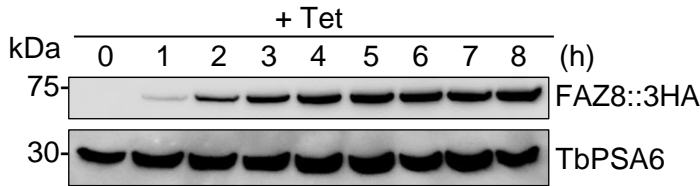

B

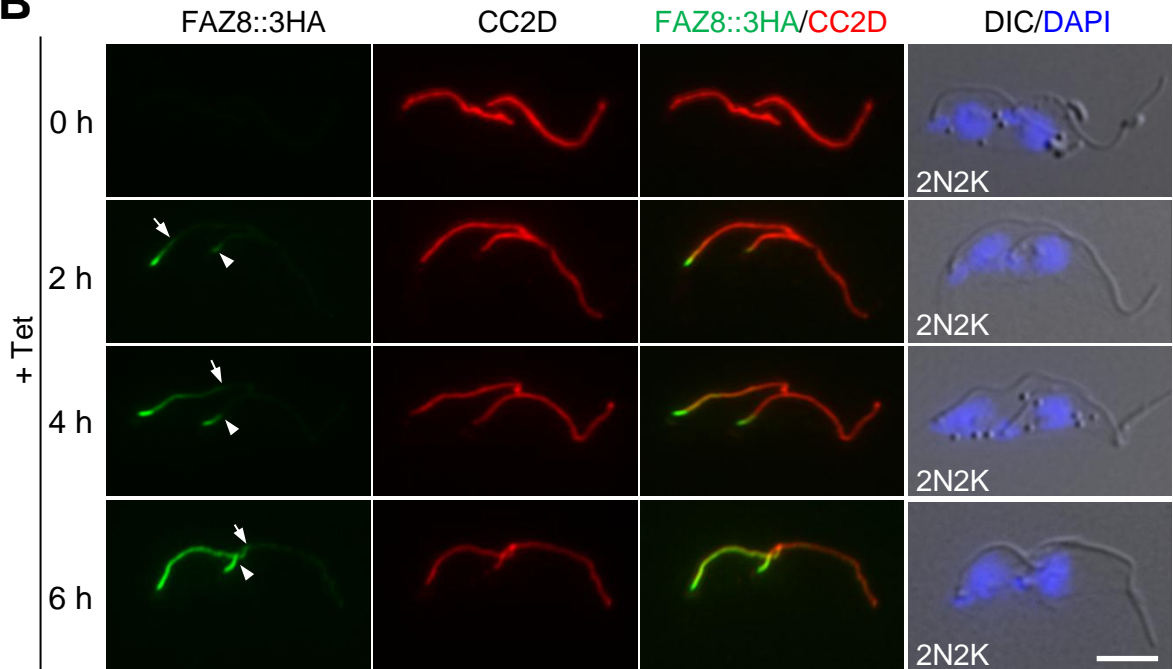

C

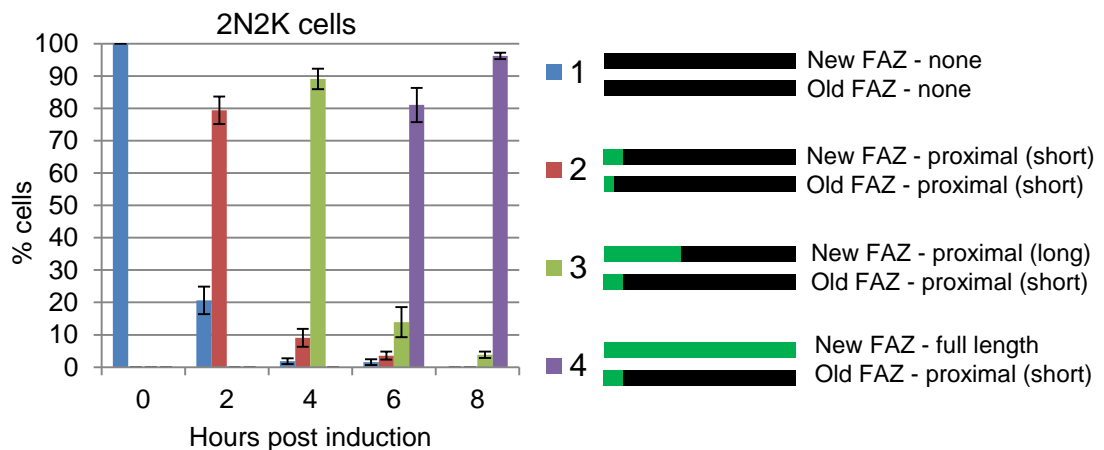

**Figure S3. Incorporation of FAZ8::3HA into the FAZ filament.** (A). Western blot to detect the overexpressed FAZ8::3HA. (B). Immunostaining of FAZ8::3HA. Cells induced for various times (h) were co-immunostained with FITC-conjugated anti-HA mAb and anti-CC2D pAb. Arrows and arrowheads indicate the growing tips of FAZ8::3HA fluorescence signal in the new and old FAZ filaments, respectively. Scale bar: 5  $\mu$ m. (C). Quantitation of 2N2K cells with different types of FAZ8::3HA pattern in the new and old FAZ filaments. About 200 cells were counted, and error bars represent S.D. calculated from three independent experiments.



**Table S1. List of the 14 proteins down-regulated from the cytoskeleton upon FAZ2 RNAi**

| GeneDB ID#                                                   | Protein      | Primary function | Fold change (D1/D0) | Fold change (D2/D0) | Subcellular localization | References for the localization |
|--------------------------------------------------------------|--------------|------------------|---------------------|---------------------|--------------------------|---------------------------------|
| <i>Category I – Flagellum attachment zone (FAZ) proteins</i> |              |                  |                     |                     |                          |                                 |
| Tb927.4.2060                                                 | FAZ8         | Unknown          | -1.35               | -1.86               | FAZ                      | this publication                |
| <i>Category II – Flagellum proteins</i>                      |              |                  |                     |                     |                          |                                 |
| Tb927.8.6230                                                 | Hypothetical | Unknown          | -1.51               | -1.78               | Flagellum                | This publication                |
| <i>Category III – Flagellum and cytoplasm proteins</i>       |              |                  |                     |                     |                          |                                 |
| Tb927.11.610                                                 | Hypothetical | Unknown          | -1.09               | -1.74               | Flagellum, cytoplasm     | this publication                |
| Tb927.11.6460                                                | Hypothetical | Unknown          | -1.81               | -1.26               | Flagellum, cytoplasm     | this publication                |
| <i>Category IV – Flagellum and cytoskeleton proteins</i>     |              |                  |                     |                     |                          |                                 |
| Tb927.11.7600                                                | Hypothetical | Unknown          | -1.72               | -3.3                | Flagellum, cytoskeleton  | this publication                |
| <i>Category V – cytoskeleton proteins</i>                    |              |                  |                     |                     |                          |                                 |
| Tb927.4.1300                                                 | Hypothetical | Unknown          | -1.26               | -1.99               | Cytoskeleton             | this publication                |
| Tb927.6.5070                                                 | Hypothetical | Unknown          | -1.4                | -1.69               | Cytoskeleton             | this publication                |
| Tb927.11.2610                                                | Hypothetical | Unknown          | -1.47               | -1.57               | Cytoskeleton             | this publication                |
| <i>Category VI – Paraflagellar rod (PFR) proteins</i>        |              |                  |                     |                     |                          |                                 |
| Tb927.6.4140                                                 | PFC4         | Unknown          | -1.39               | -2.21               | Paraflagellar rod        | Portman et al., 2009            |
| Tb927.3.3750                                                 | PFC7         | Unknown          | -4.33               | -25.1               | Paraflagellar rod        | Portman et al., 2009            |
| Tb927.2.2160                                                 | PFC11        | Unknown          | -1.24               | -1.8                | Paraflagellar rod        | Portman et al., 2009            |
| Tb927.10.9570                                                | PFC14        | Unknown          | -1.17               | -1.49               | Paraflagellar rod        | Portman et al., 2009            |
| Tb927.10.11300                                               | PFC16        | Unknown          | -1.77               | -2.56               | Paraflagellar rod        | Portman et al., 2009            |
| Tb927.8.4970                                                 | PFR2         | PFR assembly     | -1.37               | -1.97               | Paraflagellar rod        | Portman et al., 2009            |

**Table S2. Proteins precipitated by FAZ2 immunoprecipitation**

| GeneDB ID     | Protein | Total Peptides | Unique peptides | Coverage (%) |
|---------------|---------|----------------|-----------------|--------------|
| Tb09.211.4511 | KMP11   | 154            | 12              | 81.5         |
| Tb927.4.2080  | CC2D    | 115            | 59              | 69.4         |
| Tb927.1.4310  | FAZ2    | 50             | 37              | 31.4         |

**Table S3. Primer sequences and restriction enzymes used for plasmid linearization. The restriction sites used for sub-cloning were underlined.**

[Download Table S3](#)
